# Supplementary material
Source: publisher figshare collection journal article supplement (https://gsajournals.figshare.com/ndownloader/files/14929760)

# Hypothalamus

KEGG Pathway Enrichment: Genes that are repressed by reproductive experience (higher in virgins)

KEGG:mmu04723 Retrograde endocannabinoid signaling

Enrichment FDR: 2.40E-08

Genes in list have red asterisk (this image was generated in DAVID: <https://david.ncicrf.gov>)

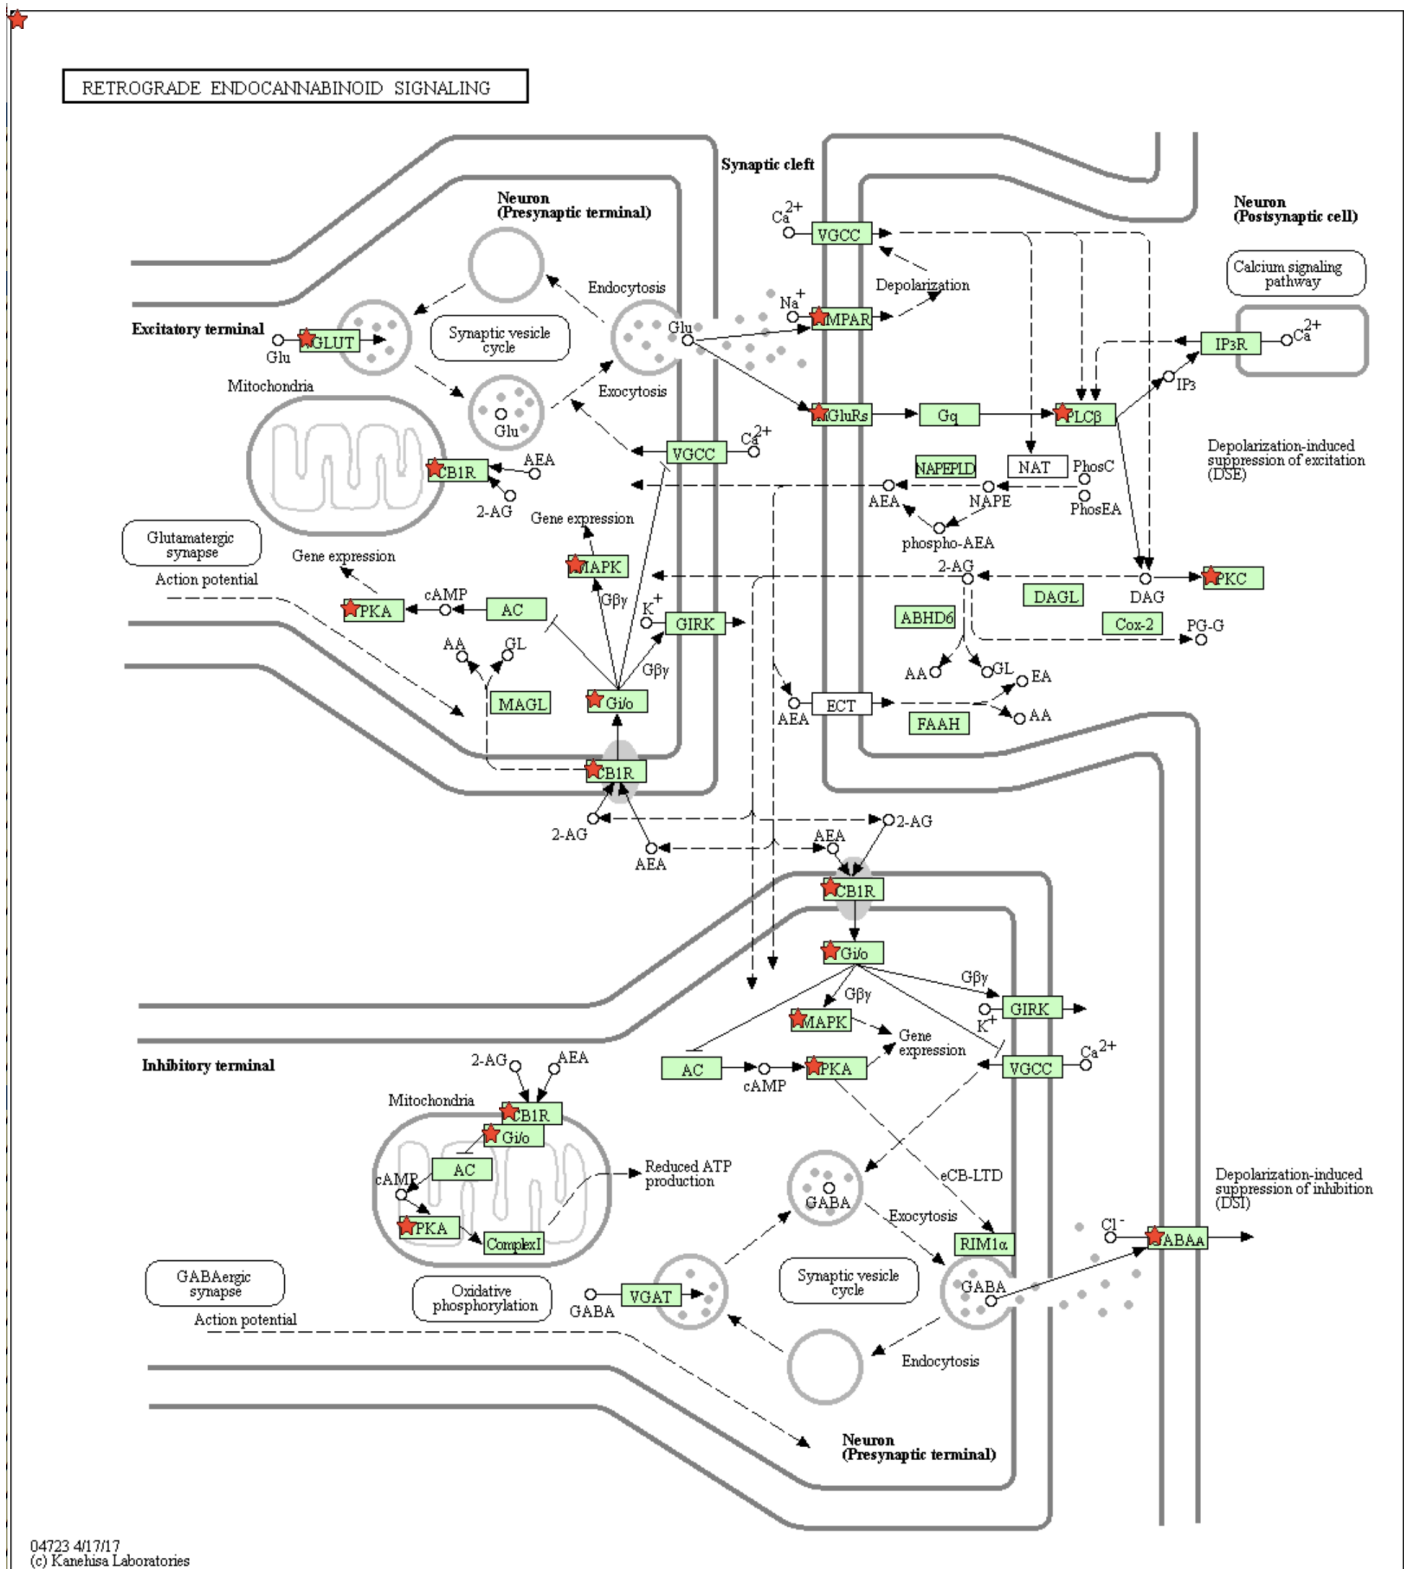

Supplement: Supplementary file 1 [file 14929760]
